# Supplementary material for: Asymmetric vinylogous Michael addition of 5-substituted-furan-2(3H)-ones to an α,β-unsaturated-γ-lactam
Source: Royal Society of Chemistry journal article supplement (doi:10.1039/d0ob01750g), 2020-01-01
Supplement: d0ob01750g2.xlsx [file d0ob01750g2.xlsx]

## Sheet: Arkusz1
COMPOUND				IDENTITY												PURITY
Compound, structure, or table-entry number		New	Known	Percentage yield	Physical state / mp range if cryst. solid	IR	UV-Vis	1H NMR	13C NMR	MS	MS Accurate mass (HRMS)	Optical rotation/ORD/CD	Enantiomeric/Diastereomeric ratio	X-ray [ORTEP and CIF in SI*]	<>	Copy of 1H/13C NMR spectrum in SI*	Copy of chromatogram in SI*	Quant. GC, HPLC, electrophoresis	Elemental analysis	<>
3a		X		X	X			X	X		X	X	X			X	X
3b		X		X	X			X	X		X	X	X			X	X
3c		X		X	X			X	X		X	X	X			X	X
3d		X		X	X			X	X		X	X	X	X		X	X
3e		X		X	X			X	X		X	X	X			X	X
3f		X		X	X			X	X		X	X	X			X	X
3g		X		X	X			X	X		X	X	X			X	X
3h		X		X	X			X	X		X	X	X			X	X
3i		X		X	X			X	X		X	X	X			X	X
3j		X		X	X			X	X		X	X	X			X	X
6a		X		X	X			X	X		X	X	X			X
7a		X		X	X			X	X		X	X	X			X
